# Supplementary material for: Zinc oxide nanocrystals as a nanoantibiotic and osteoinductive agent
Source: PubMed Central journal article supplement — RSC Adv. 2019 Apr 11;9(20):11312–21. doi: 10.1039/c8ra10236h (PMC6478122; doi:10.1039/c8ra10236h), 2019-04-11
Supplement: NIHMS82644-supplement-Supplementary_Information.pdf [file NIHMS82644-supplement-Supplementary_Information.pdf]

## Supplementary Information

### Zinc oxide nanocrystals as nano-antibiotic and osteogenic/osteoinductive agents

Nadia Garino<sup>1</sup>, Pasquale Sanvitale<sup>1</sup>, Bianca Dumontel<sup>1</sup>, Marco Laurenti<sup>1</sup>, Montserrat Colilla<sup>2,3</sup>, Isabel Izquierdo Barba<sup>2,3</sup>, Valentina Cauda<sup>1\*</sup>, Maria Vallet-Regí<sup>2,3\*</sup>

<sup>1</sup> Department of Applied Science and Technology, Politecnico di Torino, Corso Duca degli Abruzzi 24, 10129 Turin, Italy;

<sup>2</sup> Departamento de Química en Ciencias Farmacéuticas, Facultad de Farmacia, Universidad Complutense de Madrid, Plaza Ramón y Cajal s/n, 28040 Madrid, Spain.

<sup>3</sup> Networking Research Center on Bioengineering, Biomaterials and Nanomedicine (CIBER-BBN), Madrid, Spain

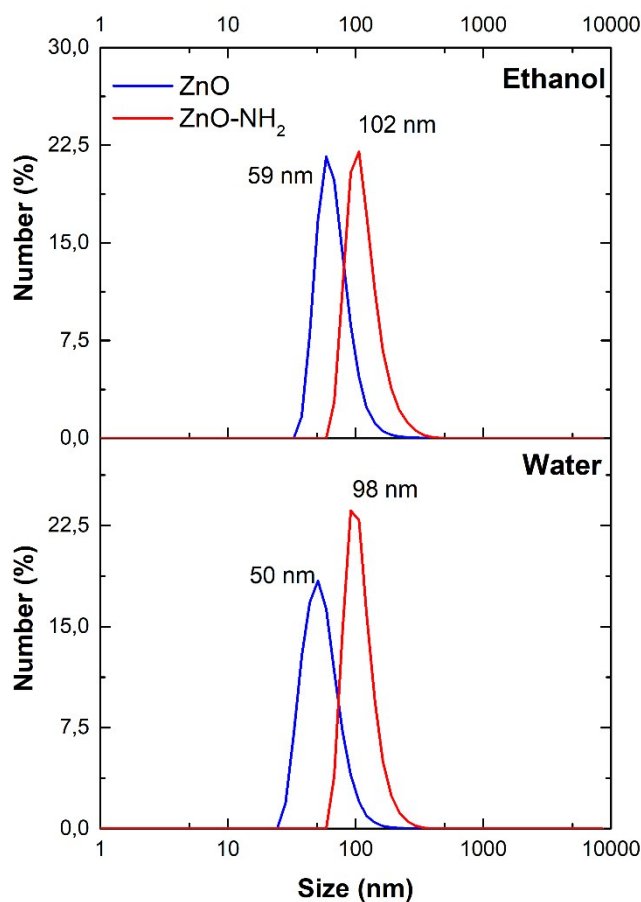

**Figure S1.** Size distribution curves deriving from Dynamic Light Scattering (DLS) measurements for ZnO and ZnO-NH<sub>2</sub> NCs in Ethanol (top) and water (bottom)

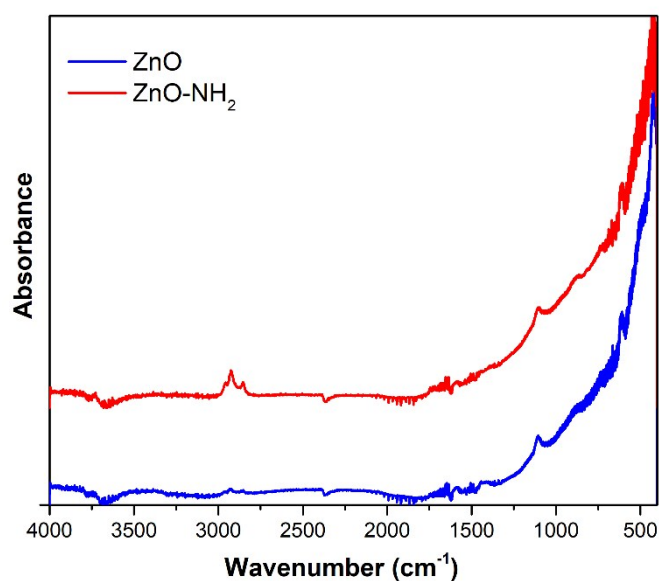

**Figure S2.** Fourier Transform Infra-Red (FT-IR) spectra of ZnO and ZnO-NH<sub>2</sub> NCs

The FT-IR spectra (Figure S2) of ZnO and ZnO-NH<sub>2</sub> nanocrystals show both an intense mode at 440 cm<sup>-1</sup> typical of Zn-O vibration. In addition, the two spectra show, with different intensities, the symmetric and antisymmetric stretching of -CH<sub>2</sub> and -CH<sub>3</sub> groups at 2860 and 2925 cm<sup>-1</sup>, respectively. These vibrations are attributed to residual acetate groups on the ZnO surface due to the precursors used in the synthetic procedure. However, in the case of ZnO-NH<sub>2</sub> NCs, the 2860 and 2925 cm<sup>-1</sup> stretching modes are more intense because of the presence of the propyl chain of the amine-functional group, thus confirming the successful functionalization of the ZnO surface.

Moreover, the broad band from 3600 to 3400 cm<sup>-1</sup>, due to the stretching vibrations of hydroxyl groups on the ZnO surface, are less pronounced in the ZnO-NH<sub>2</sub> sample with respect to the pristine ZnO. Since the APTMS moiety links through hydroxyl groups to the oxide surface (Zn-OH), leading to Zn-O-SiR bonds, the above-mentioned-observation further confirms the successful amine functionalization of our ZnO NCs.

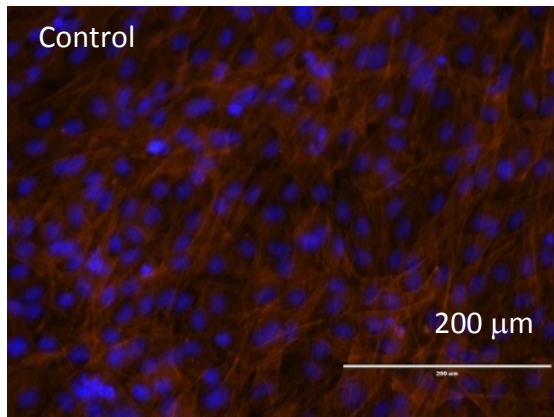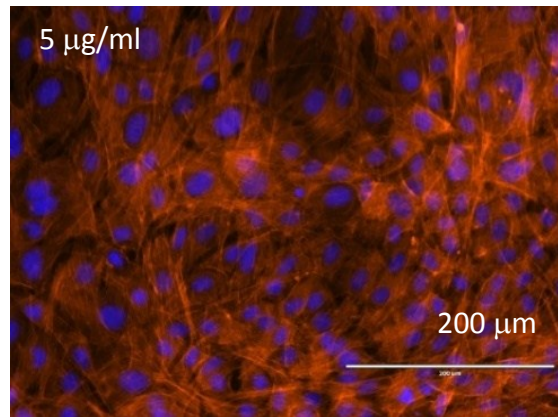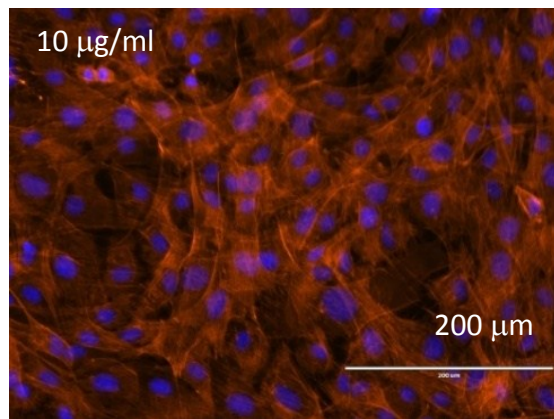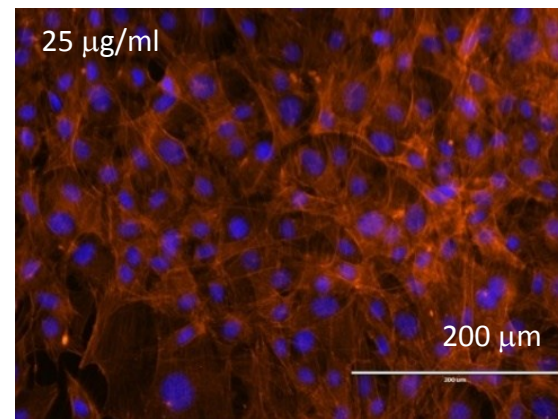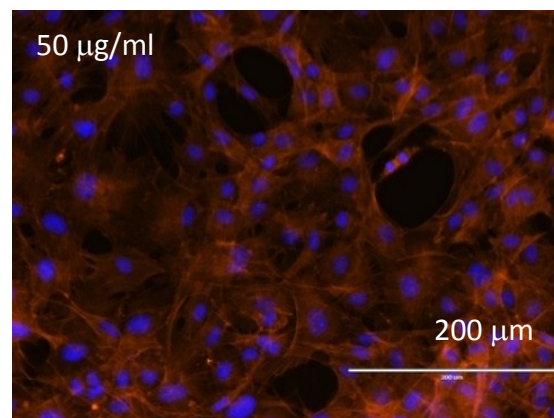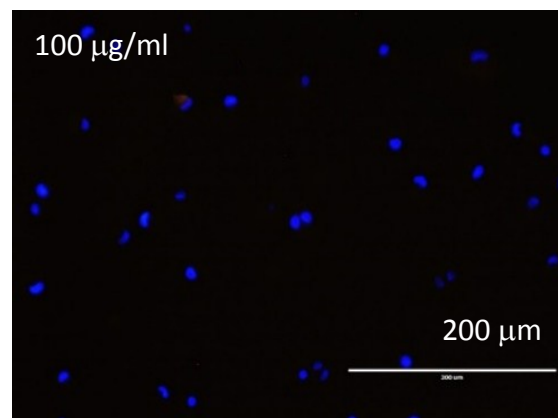

**Figure S3.** Fluorescent microscope images of pre-osteoblasts cultured up to 70 % of confluence after incubation for 4 days with ZnO NCs at different concentrations.

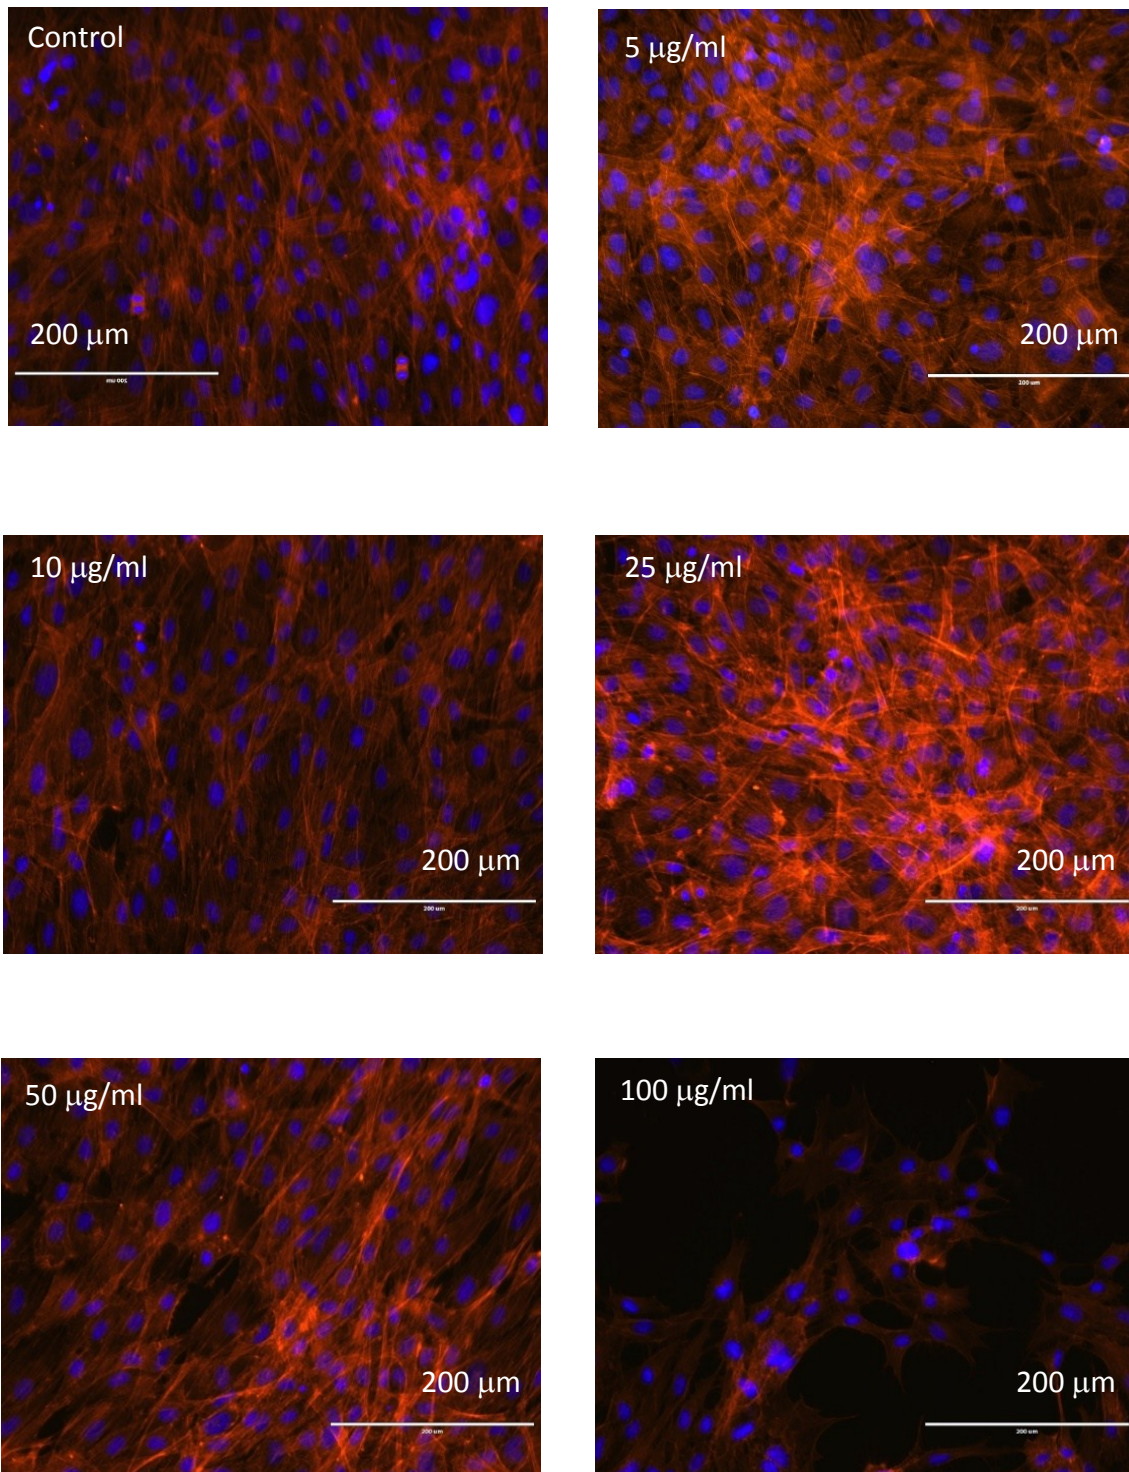

**Figure S4.** Fluorescent microscope images of pre-osteoblasts cultured up to 70 % of confluence after incubation for 4 days with ZnO-NH<sub>2</sub> NCs at different concentrations.

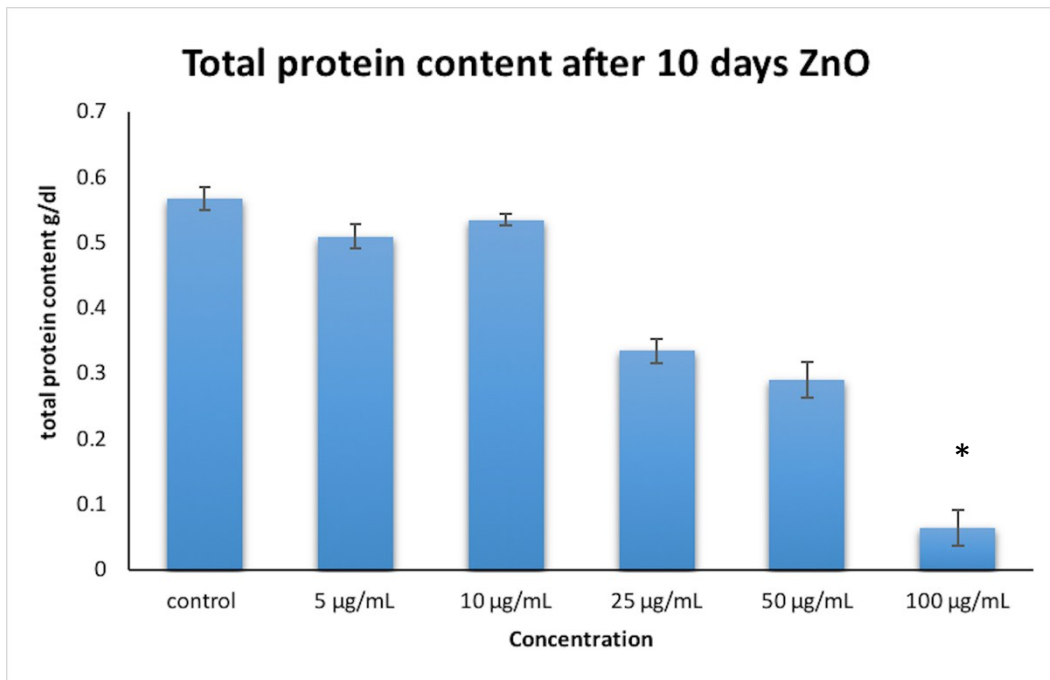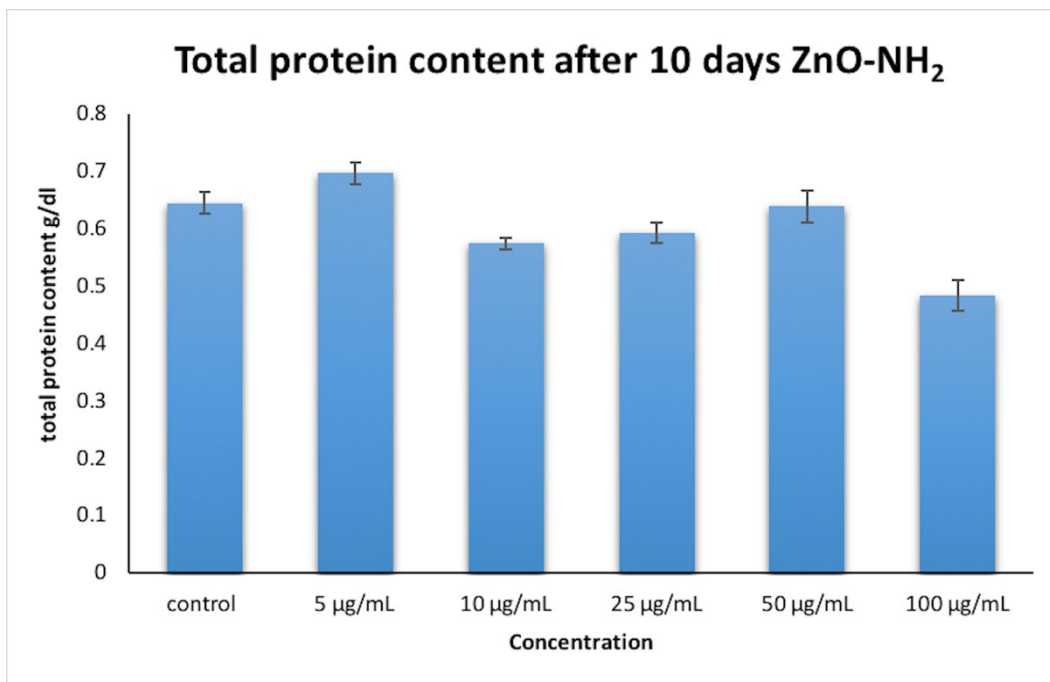

**Figure S5.** Differentiation assays in term of total protein content after 10 days of incubation with ZnO (top) and ZnO-NH<sub>2</sub> (bottom) NCs at different concentrations. ( $p < 0.05$ , significant differences compared to control denoted by an asterisk).

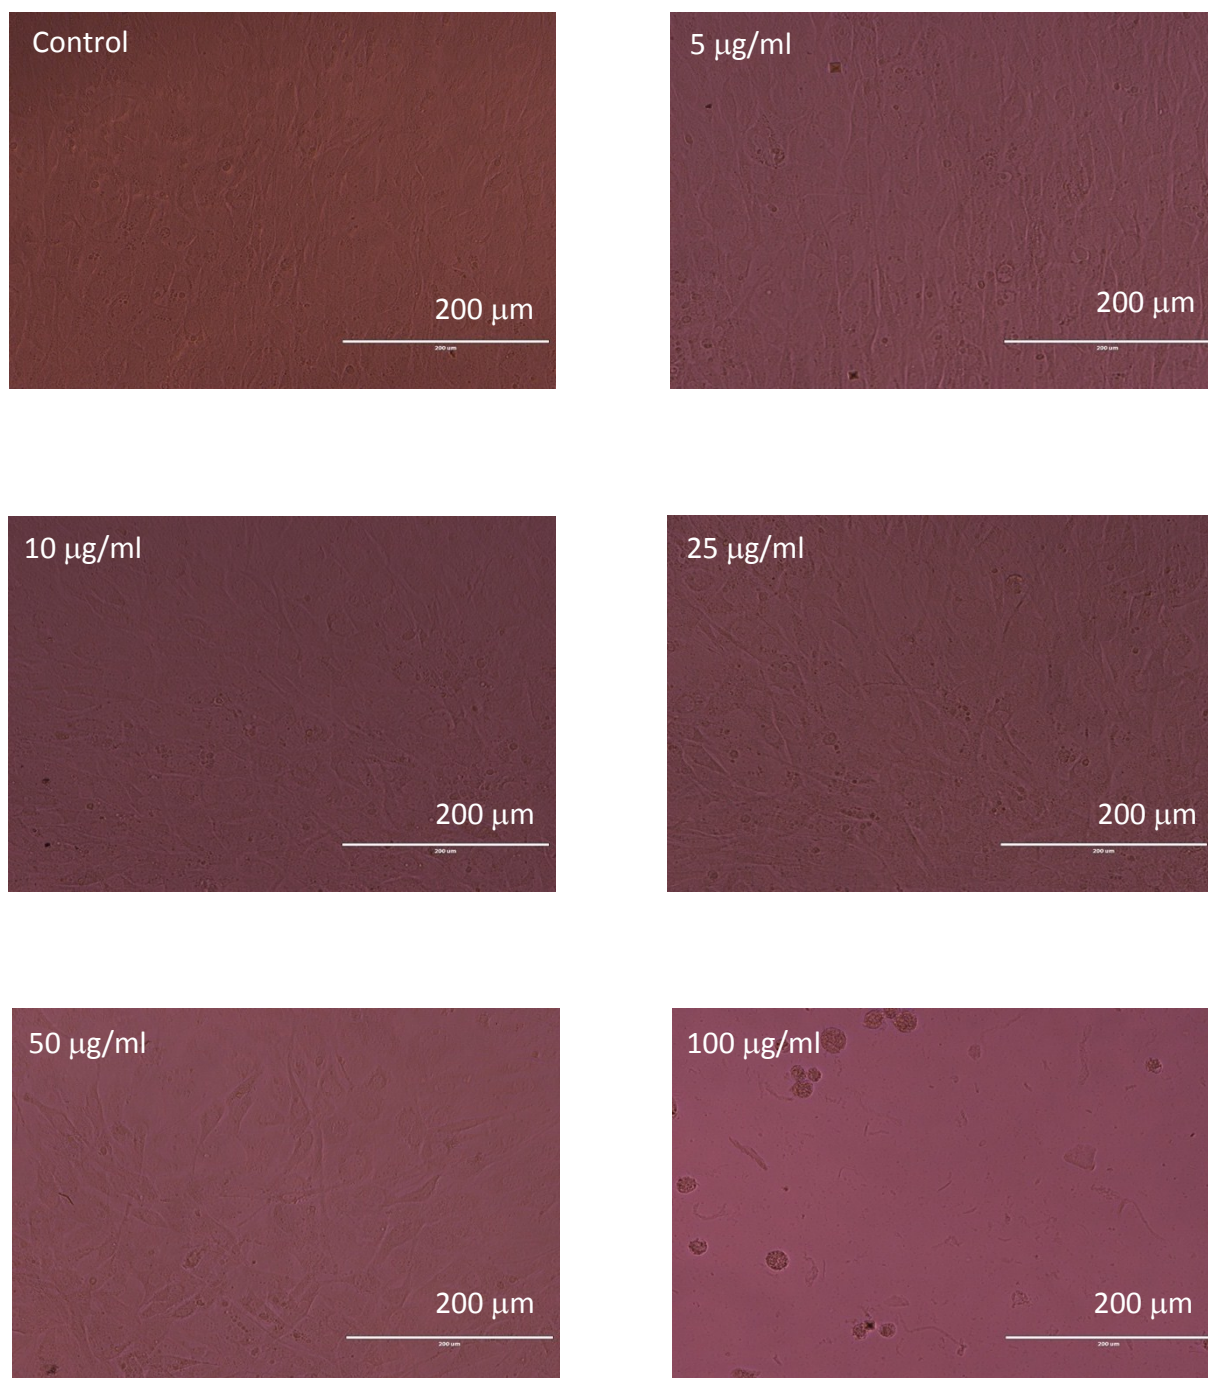

**Figure S6.** Cell morphology evaluation by optical microscopy of MC3T3-E1 pre-osteoblast cells after 10 days of incubation with ZnO NCs.

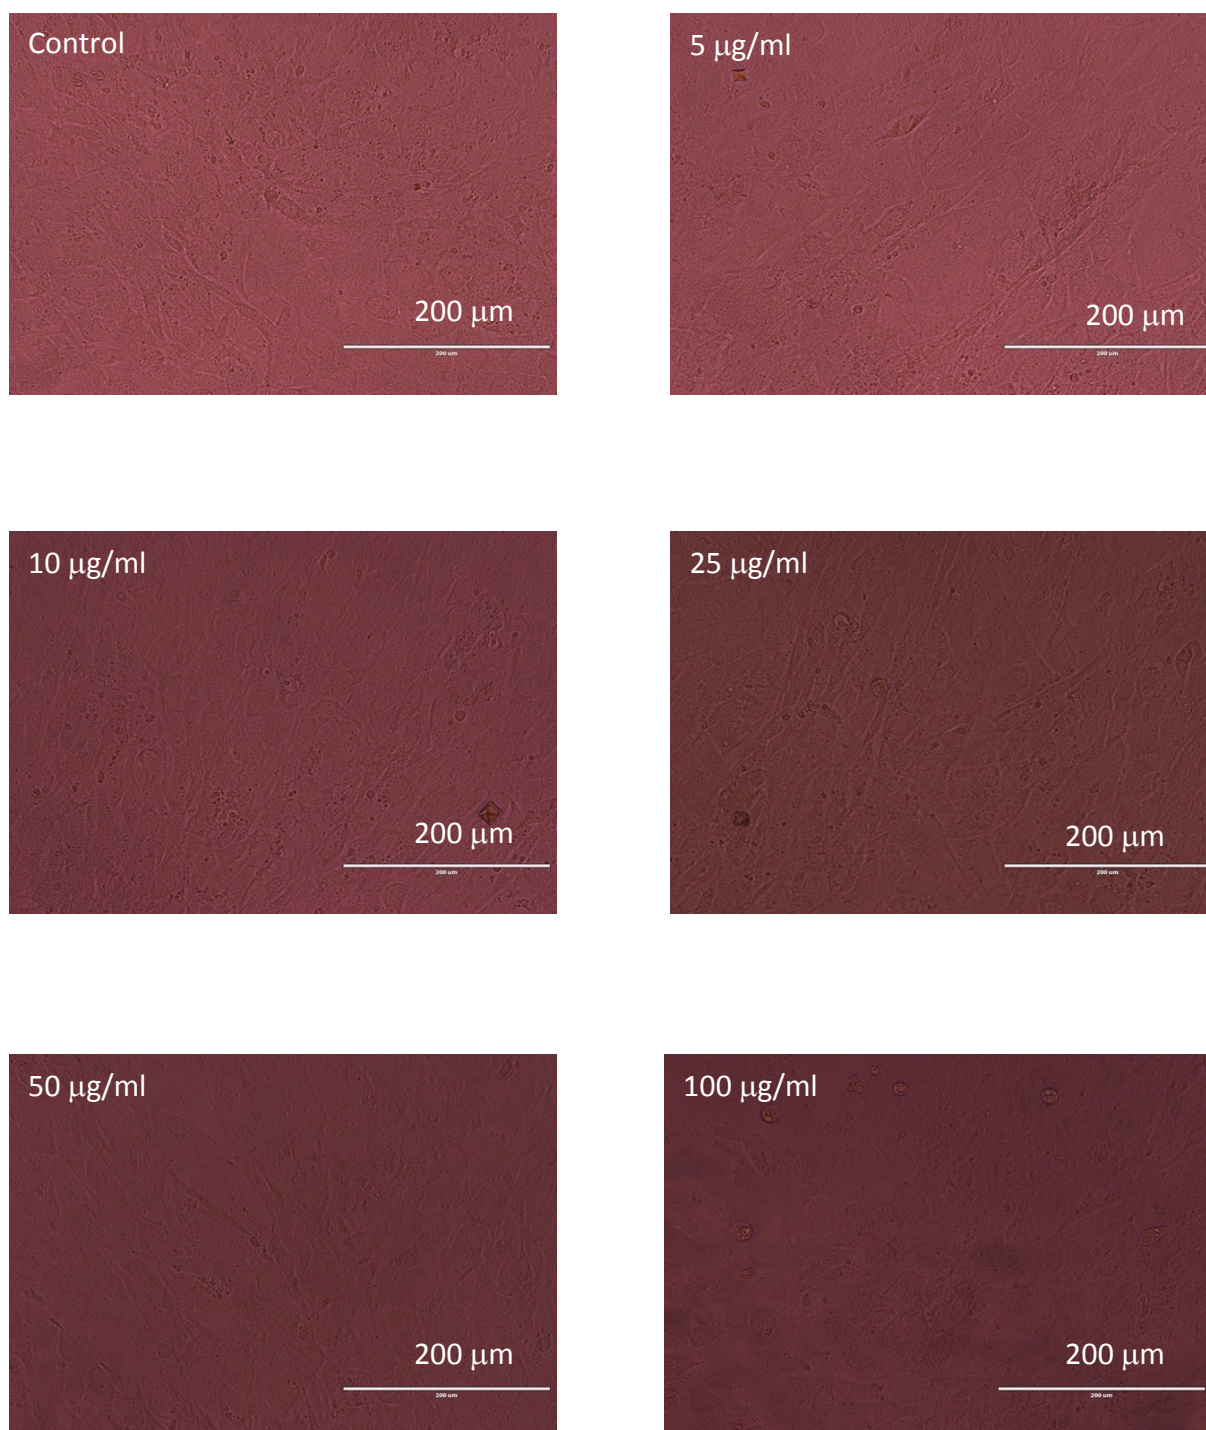

**Figure S7.** Cell morphology evaluation by optical microscopy of MC3T3-E1 pre-osteoblast cells after 10 days of incubation with ZnO-NH<sub>2</sub> NCs.

**Table S1.** Reduction in bacteria viability after 24 h of incubation with ZnO and ZnO-NH<sub>2</sub> NCs, respectively. The values shown in bold indicate a CFU concentration less than 10<sup>2</sup> CFU/ml, which is considered as positive effectiveness.

| Concentration | <i>E. coli</i> vs ZnO | <i>E. coli</i> vs ZnO-NH <sub>2</sub> | <i>S. aureus</i> vs ZnO | <i>S. aureus</i> vs ZnO-NH <sub>2</sub> |
|---------------|-----------------------|---------------------------------------|-------------------------|-----------------------------------------|
| 5 µg/mL       | <b>99.999%</b>        | <b>100%</b>                           | 99.923%                 | 99.935%                                 |
| 10 µg/mL      | <b>100%</b>           | <b>100%</b>                           | 99.965%                 | 99.963%                                 |
| 25 µg/mL      | <b>100%</b>           | <b>100%</b>                           | <b>99.985%</b>          | <b>99.990%</b>                          |
| 50 µg/mL      | <b>100%</b>           | <b>100%</b>                           | 99.940%                 | 99.853%                                 |
| 100 µg/mL     | <b>100%</b>           | <b>100%</b>                           | 99.963%                 | 99.883%                                 |
